# Supplementary material for: Identification and Characterization of Aspergillus nidulans Mutants Impaired in Asexual Development under Phosphate Stress
Source: MDPI journal article supplement (doi:10.3390/cells8121520), 2019-11-26
Supplement: s1 [file s1]

|                    |                                                                                                                                                                                        |                        |
|--------------------|----------------------------------------------------------------------------------------------------------------------------------------------------------------------------------------|------------------------|
| BD177              | <i>pyrG89; argB2; ΔflbB::riboBAfum, pabaB22, pyroA4, ΔnkuA::argB; riboB2, veA1</i>                                                                                                     | [1]                    |
| BD178              | <i>pyrG89; argB2; pabaB22, pyroA4, ΔnkuA::argB; riboB2, ΔflbE::riboBAfum, veA1.</i>                                                                                                    | [1]                    |
| BD198              | <i>pyrG8; argB2; pabaB22, pyroA4, ΔnkuA::argB; riboB2, ΔflbD::riboBAfum, veA1</i>                                                                                                      | [2]                    |
| BD228              | <i>pyrG89; argB2; pyroA4, ΔnkuA::argB; ΔflbC::pyrGAfum; veA1</i>                                                                                                                       | [3]                    |
| BD246              | <i>pyrG89; argB2; pyroA4, ΔnkuA::argB; flbD::gfp::pyrGAfum, veA1</i>                                                                                                                   | [2]                    |
| BD274              | <i>pyrG89; argB2; ΔflbB::riboBAfum, pabaB22, pyroA4, ΔnkuA::argB; riboB2, veA1, ΔflbD::pyrGAfum</i>                                                                                    | [2]                    |
| BD376              | <i>pyrG89; argB2; pyroA4, ΔnkuA::argB; ΔbrlA::pyrGAfum; veA1</i>                                                                                                                       | A. Garzia, unpublished |
| BD689              | <i>pyrG89; ΔfluG::pyrGAfum, argB2; pyroA4, ΔnkuA::argB; veA1</i>                                                                                                                       | [4]                    |
| BD950<br>(FLIP166) | <i>pyrG89; An12172<sup>Ile94Asn</sup>; argB2; ΔflbB::riboBAfum, pabaB22, pyroA4, ΔnkuA::argB; pmtC<sup>Pro282Leu</sup>, acdA<sup>Leu99Arg</sup>; riboB2, veA1</i>                      | This study             |
| BD951              | <i>pyrG89; An12172<sup>Ile94Asn</sup>; argB2; ΔflbB::riboBAfum, pabaB22, pyroA4, ΔnkuA::argB; pmtC<sup>Pro282Leu</sup>, acdA<sup>Leu99Arg</sup>; riboB2, veA1; pRG3-AMA-NotI::socA</i> | This study             |
| BD955              | <i>pyrG89; An12172<sup>Ile94Asn</sup>; argB2; ΔflbB::riboBAfum, pabaB22, pyroA4, ΔnkuA::argB; pmtC<sup>Pro282Leu</sup>, acdA<sup>Leu99Arg</sup>; riboB2, veA1; pRG3-AMA-NotI::flbB</i> | This study             |
| BD1172             | <i>pyrG89; argB2; pyroA4, ΔnkuA::argB; ΔsocA::pyrGAfum; veA1</i>                                                                                                                       | This study             |
| BD1177             | <i>pyrG89; argB2; pyroA4, ΔnkuA::argB; socA::gfp::pyrGAfum; veA1</i>                                                                                                                   | This study             |
| BD1181             | <i>pyrG89; argB2; pyroA4, ΔnkuA::argB; gpdA<sup>r</sup>::socA::gfp::pyrGAfum; veA1</i>                                                                                                 | This study             |
| BD1174             | <i>pyrG89; argB2; ΔflbB::riboBAfum, pabaB22, pyroA4, ΔnkuA::argB; ΔsocA::pyrGAfum; riboB2, veA1</i>                                                                                    | This study             |
| BD1179             | <i>pyrG89; argB2; ΔflbB::riboBAfum, pabaB22, pyroA4, ΔnkuA::argB; socA::gfp::pyrGAfum; riboB2, veA1</i>                                                                                | This study             |
| BD1183             | <i>pyrG89; argB2; ΔflbB::riboBAfum, pabaB22, pyroA4, ΔnkuA::argB; gpdA<sup>r</sup>::socA::gfp::pyrGAfum; riboB2, veA1</i>                                                              | This study             |
| BD1245             | <i>pyrG89; argB2; pyroA4, ΔnkuA::argB; socA::ha3x::pyrGAfum; veA1</i>                                                                                                                  | This study             |
| BD1249             | <i>pyrG89; argB2; ΔflbB::riboBAfum, pabaB22, pyroA4, ΔnkuA::argB; socA::ha3x::pyrGAfum; riboB2, veA1</i>                                                                               | This study             |
| BD1247             | <i>pyrG89; argB2; pyroA4, ΔnkuA::argB; gpdA<sup>r</sup>::socA::ha3x::pyrGAfum; veA1</i>                                                                                                | This study             |
| BD1251             | <i>pyrG89; argB2; ΔflbB::riboBAfum, pabaB22, pyroA4, ΔnkuA::argB; gpdA<sup>r</sup>::socA::ha3x::pyrGAfum; riboB2, veA1</i>                                                             | This study             |
| BD1291             | <i>pyrG89; An12172::gfp::pyrGAfum; argB2; ΔflbB::riboBAfum, pabaB22, pyroA4, ΔnkuA::argB; pmtC<sup>Pro282Leu</sup>, acdA<sup>Leu99Arg</sup>; riboB2, veA1</i>                          | This study             |
| BD1294             | <i>pyrG89; An12172::gfp::pyrGAfum; argB2; pyroA4, ΔnkuA::argB; veA1</i>                                                                                                                | This study             |
| BD1296             | <i>pyrG89; An12172<sup>Ile94Asn</sup>::gfp::pyrGAfum; argB2; pyroA4, ΔnkuA::argB; veA1</i>                                                                                             | This study             |

|              |                                                                                                                                                                                     |                          |
|--------------|-------------------------------------------------------------------------------------------------------------------------------------------------------------------------------------|--------------------------|
| BD1299       | <i>pyrG89; An12172::gfp::pyrG<sup>Afum</sup>; argB2; ΔflbB::riboB<sup>Afum</sup>, pabaB22, pyroA4, ΔnkuA::argB; riboB2, veA1</i>                                                    | This study               |
| BD1302       | <i>pyrG89; An12172<sup>Ile94Asn</sup>::gfp::pyrG<sup>Afum</sup>; argB2; ΔflbB::riboB<sup>Afum</sup>, pabaB22, pyroA4, ΔnkuA::argB; riboB2, veA1</i>                                 | This study               |
| BD1305       | <i>pyrG89; An12172<sup>Ile94Asn</sup>; argB2; ΔflbB::riboB<sup>Afum</sup>, pabaB22, pyroA4, ΔnkuA::argB; pmtC<sup>Pro282Leu</sup>, acdA::gfp::pyrG<sup>Afum</sup>; riboB2, veA1</i> | This study               |
| BD1308       | <i>pyrG89; argB2; pyroA4, ΔnkuA::argB; acdA::gfp::pyrG<sup>Afum</sup>; veA1</i>                                                                                                     | This study               |
| BD1310       | <i>pyrG89; argB2; pyroA4, ΔnkuA::argB; acdA<sup>Leu99Arg</sup>::gfp::pyrG<sup>Afum</sup>; veA1</i>                                                                                  | This study               |
| BD1313       | <i>pyrG89; argB2; ΔflbB::riboB<sup>Afum</sup>, pabaB22, pyroA4, ΔnkuA::argB; acdA::gfp::pyrG<sup>Afum</sup>; riboB2, veA1</i>                                                       | This study               |
| BD1316       | <i>pyrG89; argB2; ΔflbB::riboB<sup>Afum</sup>, pabaB22, pyroA4, ΔnkuA::argB; acdA<sup>Leu99Arg</sup>::gfp::pyrG<sup>Afum</sup>; riboB2, veA1</i>                                    | This study               |
| BD1319       | <i>pyrG89; An12172<sup>Ile94Asn</sup>; argB2; ΔflbB::riboB<sup>Afum</sup>, pabaB22, pyroA4, ΔnkuA::argB; pmtC::gfp::pyrG<sup>Afum</sup>, acdA<sup>Leu99Arg</sup>; riboB2, veA1</i>  | This study               |
| BD1323       | <i>pyrG89; argB2; pyroA4, ΔnkuA::argB; pmtC::gfp::pyrG<sup>Afum</sup>; veA1</i>                                                                                                     | This study               |
| BD1327       | <i>pyrG89; argB2; pyroA4, ΔnkuA::argB; pmtC<sup>Pro282Leu</sup>::gfp::pyrG<sup>Afum</sup>; veA1</i>                                                                                 | This study               |
| BD1330       | <i>pyrG89; argB2; ΔflbB::riboB<sup>Afum</sup>, pabaB22, pyroA4, ΔnkuA::argB; pmtC::gfp::pyrG<sup>Afum</sup>; riboB2, veA1</i>                                                       | This study               |
| BD1333       | <i>pyrG89; argB2; ΔflbB::riboB<sup>Afum</sup>, pabaB22, pyroA4, ΔnkuA::argB; pmtC<sup>Pro282Leu</sup>::gfp::pyrG<sup>Afum</sup>; riboB2, veA1</i>                                   | This study               |
| BD1351       | <i>pyrG89; argB2; ΔflbB::riboB<sup>Afum</sup>, pabaB22, pyroA4, ΔnkuA::argB; pmtC<sup>Arg762Gly</sup>::gfp::pyrG<sup>Afum</sup>; riboB2, veA1</i>                                   | This study               |
| BD1352       | <i>pyrG89; argB2; ΔflbB::riboB<sup>Afum</sup>, pabaB22, pyroA4, ΔnkuA::argB; pmtC<sup>Tyr767Stop</sup>::gfp::pyrG<sup>Afum</sup>; riboB2, veA1</i>                                  | This study               |
| CAΔTMPBP1    | <i>pabaA1, γA2; ΔtmpB::riboB</i>                                                                                                                                                    | [5]                      |
| FGSC26       | <i>biA1 veA1</i>                                                                                                                                                                    | [6]                      |
| FGSCA68      | <i>suA1adE20, γA2, adE20; acrA1; phenA2; pyroA4; lysB5; sB3; nicB8; riboB2, veA1</i>                                                                                                | [6]                      |
| FGSCA283     | <i>suA1adE20 γA2 adE20 acrA1 galA1 pyroA4 (ssb+) facA303 sB3 nicB8 riboB2 veA1</i>                                                                                                  | Fungal Gen. Stock Center |
| FLIP mutants | <i>pyrG89; argB2; ΔflbB::riboB<sup>Afum</sup>, pabaB22, pyroA4, ΔnkuA::argB; riboB2, veA1; unknown mutation(s)</i>                                                                  | This study               |
| RMSO11       | <i>pabaA1 γA2 ΔargB::trpCΔB trpC801 veA1</i>                                                                                                                                        | [7]                      |
| TGS6         | <i>pabaA1, γA2; ΔargB::trpCΔB; trpC801, ΔtmpA::argB, veA1</i>                                                                                                                       | [8]                      |
| TN02A3       | <i>pyrG89; argB2; pyroA4, ΔnkuA::argB; veA1</i>                                                                                                                                     | [9]                      |

Table S2: Strains of *Aspergillus nidulans* used in this study.

1. Garzia, A.; Etxebeste, O.; Herrero-Garcia, E.; Fischer, R.; Espeso, E. A.; Ugalde, U. *Aspergillus nidulans* FlbE is an upstream developmental activator of conidiation functionally associated with the putative transcription factor FlbB. *Mol. Microbiol.* **2009**, *71*, 172–184.

2. Garzia, A.; Etxebeste, O.; Herrero-García, E.; Ugalde, U.; Espeso, E. A. The concerted action of bZip and cMyb transcription factors FlbB and FlbD induces *brlA* expression and asexual development in *Aspergillus nidulans*. *Mol. Microbiol.* **2010**, *75*, 1314–1324.
3. Kwon, N.-J.; Garzia, A.; Espeso, E. A.; Ugalde, U.; Yu, J.-H. FlbC is a putative nuclear C2H2 transcription factor regulating development in *Aspergillus nidulans*. *Mol. Microbiol.* **2010**, *77*, 1203–1219, doi:10.1111/j.1365-2958.2010.07282.x.
4. Iradi-Serrano, M.; Tola-García, L.; Cortese, M. S.; Ugalde, U. The early asexual development regulator *fluG* codes for a putative bifunctional enzyme. *Front. Microbiol.* **2019**, *10*, 778, doi:10.3389/fmicb.2019.00778.
5. Soid-Raggi, G.; Sánchez, O.; Ramos-Balderas, J. L.; Aguirre, J. The Adenylate-Forming Enzymes AfeA and TmpB Are Involved in *Aspergillus nidulans* Self-Communication during Asexual Development. *Front. Microbiol.* **2016**, *7*, 353, doi:10.3389/fmicb.2016.00353.
6. Käfer, E. Origins of translocations in *Aspergillus nidulans*. *Genetics* **1965**, *52*, 217 LP-232.
7. Stringer, M. A.; Dean, R. A.; Sewall, T. C.; Timberlake, W. E. Rodletless, a new *Aspergillus* developmental mutant induced by directed gene inactivation. *Genes Dev.* **1991**, *5*, 1161–1171, doi:10.1101/gad.5.7.1161.
8. Soid-Raggi, G.; Sánchez, O.; Aguirre, J. TmpA, a member of a novel family of putative membrane flavoproteins, regulates asexual development in *Aspergillus nidulans*. *Mol. Microbiol.* **2005**, *59*, 854–869, doi:10.1111/j.1365-2958.2005.04996.x.
9. Nayak, T.; Szewczyk, E.; Oakley, C. E.; Osmani, A.; Ukil, L.; Murray, S. L.; Hynes, M. J.; Osmani, S. A.; Oakley, B. R. A versatile and efficient gene-targeting system for *Aspergillus nidulans*. *Genetics* **2006**, *172*, 1557–66.
