# Supplementary material for: Identification and Characterization of Aspergillus nidulans Mutants Impaired in Asexual Development under Phosphate Stress
Source: MDPI journal article supplement (doi:10.3390/cells8121520), 2019-11-26
Supplement: s1 [file s1]

**Supplementary Table 2: Oligonucleotides used in this study.**

| Name            | Sequence (5'→3')                                     | Objective                                                                                                                                                              |
|-----------------|------------------------------------------------------|------------------------------------------------------------------------------------------------------------------------------------------------------------------------|
| flbD-PP1        | CGACTCCATGACCACATTCC                                 | Amplification of <i>flbD::gfp::pyrG<sup>Afum</sup></i> construct                                                                                                       |
| flbD-GSP4       | GGCAGGCGTTACTGTATACGT                                |                                                                                                                                                                        |
| pRG3Up          | GAATTCGAGCTCGGTACC                                   | Sequencing of the flanking regions of the insert of pRG3                                                                                                               |
| pRG3Down        | AAGCTTGCATGCGCGGCC                                   |                                                                                                                                                                        |
| An8501-sek1     | CGTTGGTCCGTTTCGCATGAAGC                              | Sequencing of the ORF of <i>An8501/socA</i>                                                                                                                            |
| An8501-sek2     | CGTGTTATCGCCGAGATCAGAGG                              |                                                                                                                                                                        |
| An8501-sek3     | CGTCACTCATAACGCTAGCCACCC                             |                                                                                                                                                                        |
| An8501-sek4     | GCGAAGCGATCTGTGAGGTCC                                |                                                                                                                                                                        |
| An8501-PP1      | CGACGAAGGCCCATACCATCC                                | Deletion and tagging of <i>An8501/socA</i> with <i>gfp<sup>Afum</sup></i> or <i>ha<sub>3x</sub></i> (native promoter or constitutive <i>gpdA<sup>P</sup></i> promoter) |
| An8501-PP2      | CATGAGCAGCGCCCGTCAATGG                               |                                                                                                                                                                        |
| An8501-GSP3     | TAAGTGTTGGTGCACCTCCGACACG                            |                                                                                                                                                                        |
| An8501-GSP4     | GCAGCAGCCCATCTCGACTTCC                               |                                                                                                                                                                        |
| An8501-GSP1     | GAGACCAACAACGTCGGCGG                                 |                                                                                                                                                                        |
| An8501-GSP2     | GACGCTCGTCCTAGGAGGCG                                 |                                                                                                                                                                        |
| An8501-SMP1     | CCATTGACGGGCGCTGCTCATGACCGGTCGCCT<br>CAAACAATGCTCT   |                                                                                                                                                                        |
| An8501-GFP1     | CGCCTCCTAGGACGAGCGTCGGAGCTGGTGCAG<br>GCGCTGGAGCC     |                                                                                                                                                                        |
| An8501-GFP2     | CGTGTCGGAAGTGCACCAACACTTAGTCTGAGA<br>GGAGGCACTGATGCG |                                                                                                                                                                        |
| An8501-geneSP   | ATGTCGGAAACTCTCCCCAGACG                              |                                                                                                                                                                        |
| An8501-PP2'-ATG | GAGCAGCGCCCGTCAATGG                                  |                                                                                                                                                                        |
| An8501-gpdAUp   | CCATTGACGGGCGCTGCTCCCATCCGGTGCTCTG<br>CACTCGACC      |                                                                                                                                                                        |
| An8501-gpdADw   | CGTCTGGGGAGAGTTTCCGACATGGTGATGTCT<br>GCTCAAGCGGGG    |                                                                                                                                                                        |
| An6835-Up       | CTTGCAATTGGACGACC                                    | Sequencing of FLIP166's mutation in <i>An6835</i>                                                                                                                      |
| An6835-Dw       | CAGGACAGCTTGAAGTGC                                   |                                                                                                                                                                        |
| An12172-Up      | CAGACGCCACCCTCC                                      | Sequencing of FLIP166's mutation in <i>An12172</i>                                                                                                                     |
| An12172-Dw      | CTCCTGCATGGATAGCG                                    |                                                                                                                                                                        |
| An8615-Up       | CGAAACTGTGGAAGATCC                                   | Sequencing of FLIP166's mutation in <i>An8615</i>                                                                                                                      |
| An8615-Dw       | CTTGACGGATCAATCTGC                                   |                                                                                                                                                                        |
| An1459-Up       | GTGGGCTATGACGGC                                      | Sequencing of FLIP166's mutation in <i>An1459/pmtC</i>                                                                                                                 |
| An1459-Dw       | CGGCTAGCTCGTGCG                                      |                                                                                                                                                                        |
| An0560-Up       | CCCAACTAAGCTGATTGCG                                  | Sequencing of FLIP166's mutation in <i>An0560</i>                                                                                                                      |
| An0560-dw       | CCAGCCTGTTTCGTGG                                     |                                                                                                                                                                        |
| An7222-Up       | GCCAGACTTCCACGG                                      | Sequencing of FLIP166's mutation in <i>An7222</i>                                                                                                                      |
| An7222-Dw       | GGTCGTCACCTAAGGGCG                                   |                                                                                                                                                                        |
| An8821-Up       | GGATGGAACAGCAGTGG                                    | Sequencing of FLIP166's mutation in <i>An8821</i>                                                                                                                      |
| An8821-Dw       | GGTGTTCCAGAGGGGG                                     |                                                                                                                                                                        |
| An12172-GSP1    | GTGGTTACGGGAGTCTTCCAAGTCTTTTCG                       | Tagging of WT or FLIP166's-mutant                                                                                                                                      |
| An12172-GSP2    | GTTTTTCGGCTGTGGAGGAGAAATCCAGC                        |                                                                                                                                                                        |
| AN12172-GSP3    | TAGATAACCGTCTTTATTAGAAGTACTGTGC                      |                                                                                                                                                                        |

|              |                                                            |                                                                                                  |
|--------------|------------------------------------------------------------|--------------------------------------------------------------------------------------------------|
| AN12172-GSP4 | CTGAAGACCTCTGGCCCAATGC                                     | versions of <i>An12172</i> with <i>gfp<sup>Afum</sup></i>                                        |
| AN12172-GFP1 | GCTGGATTCTCCTCCACAGCCGAAAAACGGAGCTGGTGCAGGCGCTGGAGCC       |                                                                                                  |
| AN12172-GFP2 | GCACAGTACTTCTAATAAAGACGGTTATCTAGTCTGAGAGGAGGCACTGATGCG     |                                                                                                  |
| An12335-GSP1 | CCTCCACTCCGAACAACCAAAAGTCTAACC                             | Tagging of WT or FLIP166's-mutant versions of <i>An12335/acdA</i> with <i>gfp<sup>Afum</sup></i> |
| An12335-GSP2 | GAGAAGACTCTTCAACTTCGAGAACCCATTTCGC                         |                                                                                                  |
| AN12335-GSP3 | TAGCTTTGGCTCCTTCGATAGCGTTGTGACG                            |                                                                                                  |
| AN12335-GSP4 | GTTTCTTTTCCGCACAGATGGCTAAAGAGGC                            |                                                                                                  |
| AN12335-GFP1 | GCGAATGGGTTCTCGAAGTTGAAGAGTCTTCTC GGAGCTGGTGCAGGCGCTGGAGCC |                                                                                                  |
| AN12335-GFP2 | CGTCACAACGCTATCGAAGGAGCCAAAGCTAGTCTGAGAGGAGGCACTGATGCG     |                                                                                                  |
| PmtC-GSP1    | CTGGTCATCACTATGGCCCTGAGC                                   | Tagging of WT or FLIP166's-mutant versions of <i>An1459/pmtC</i> with <i>gfp<sup>Afum</sup></i>  |
| PmtC-GSP2    | TTTCGCGAAGTGCAAGTCATAGCCAAGC                               |                                                                                                  |
| PmtC-GSP3    | TAGGAGCATCTGATCTCATCTCGTTCTCTCCC                           |                                                                                                  |
| PmtC-GSP4    | CGCTGTTGTAGCCGATGAAACTGC                                   |                                                                                                  |
| PmtC-GFP1    | GCTTGGCTATGACTTGCACTTCGCGAAAGGAGCTGGTGCAGGCGCTGGAGCC       |                                                                                                  |
| PmtC-GFP2    | GGGAGAGAACGAGATGAGATCAGATGCTCCTAGTCTGAGAGGAGGCACTGATGCG    |                                                                                                  |
| PmtC-sek1    | CAGGAACACCTCGATCC                                          | Sequencing of the ORF of <i>An1459/pmtC</i>                                                      |
| PmtC-sek4    | CACCGGCGAACACAGC                                           |                                                                                                  |
|              |                                                            |                                                                                                  |
|              |                                                            |                                                                                                  |
